# Supplementary material for: Assessment of aloe vera for qualitative fit testing of particulate respirators: a logistic regression approach
Source: PubMed Central journal article supplement — Ind Health. 2019 Jun 1;58(1):46–53. doi: 10.2486/indhealth.2109-0019 (PMC6997717; doi:10.2486/indhealth.2109-0019), 2019-06-01
Supplement: indhealth-58-046-s001.pdf [file indhealth-58-046-s001.pdf]

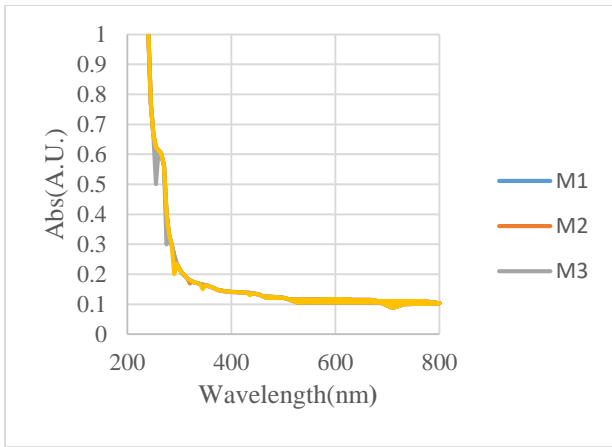

**S1**

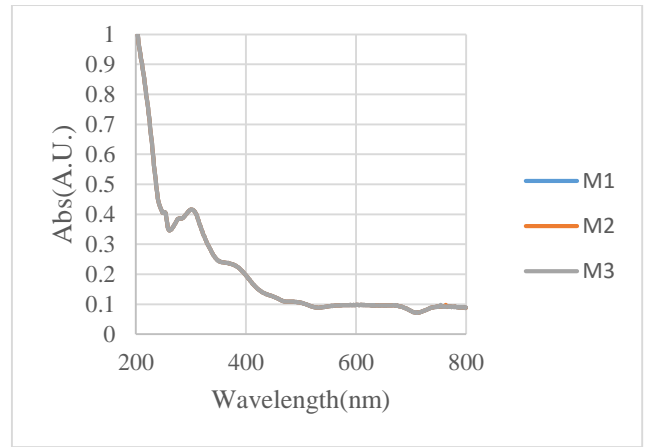

**S2**

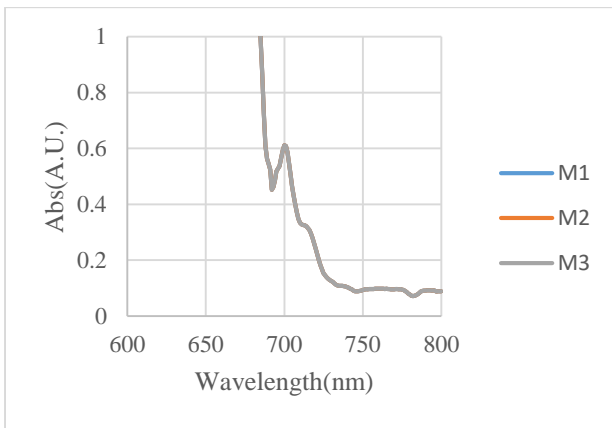

**S3**

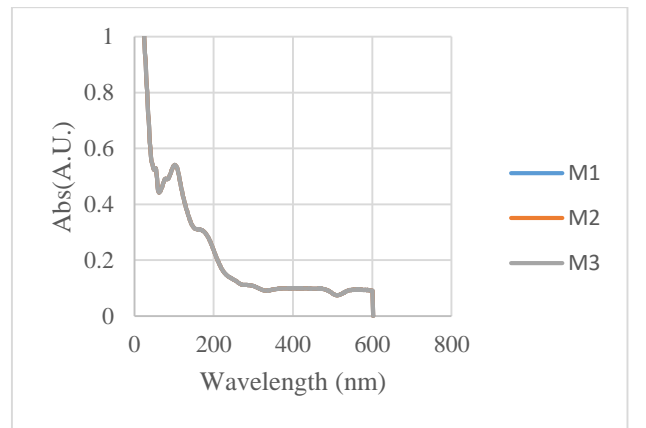

**S4**

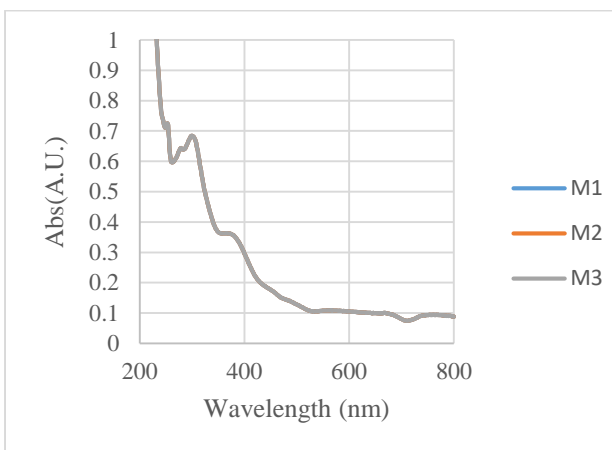

**S5**

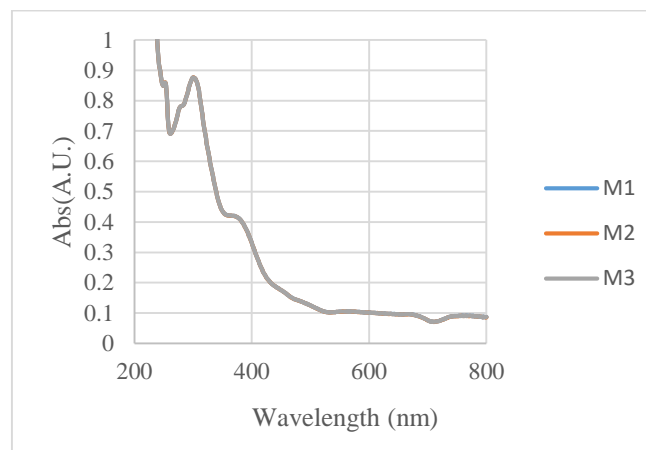

**S6**

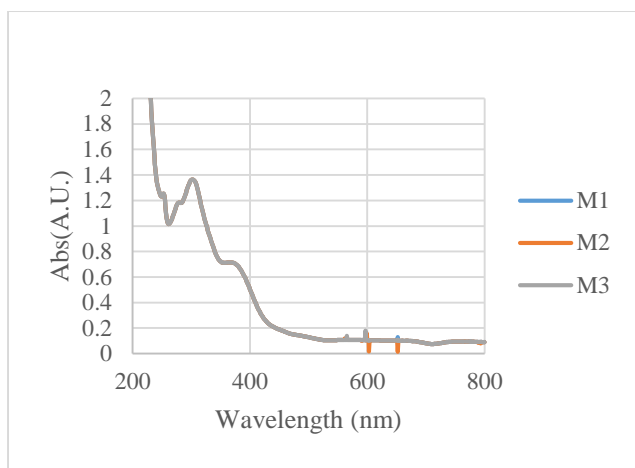

S7

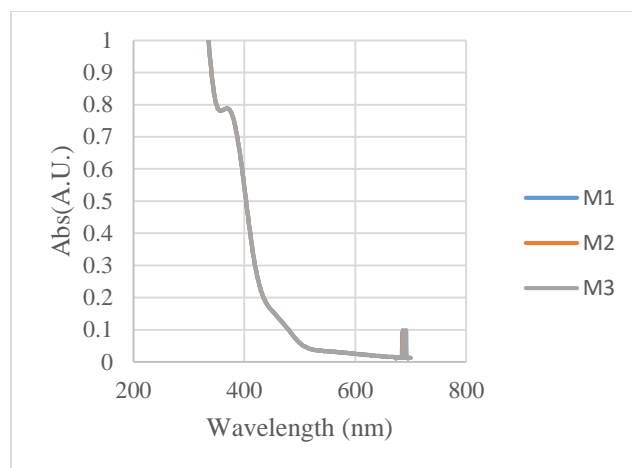

S8

**Supplementary Figs. 1-8. The optical molecular spectra of the threshold solutions (UV-Vis) at different studied concentrations: S1: commercial Bitrex™ (0.135 mg/ml), S2: A. vera (10.7 mg/ml), S3: A. vera (18.8 mg/ml), S4: A. vera (26.2 mg/ml), S5: A. vera (41.7 mg/ml), S6: A. vera (58.3 mg/ml), S7: A. vera (75 mg/ml), S8: A. vera (91.7 mg/ml).**
